1     **On the joint effect of endogenous spatial attention and defocus blur**  
2             **on acuity: attentional limit to the resolving power of the eye**

3     De Lestrange-Anginieur E<sup>1\*</sup>, Leung TW<sup>1</sup>, and Kee CS<sup>1,2</sup>

4

5

6             1. School of Optometry, Hong Kong Polytechnic University, Hong Kong

7             2. Interdisciplinary Division of Biomedical Engineering, Hong Kong Polytechnic  
8             University, Hong Kong SAR, China

9

10    Correspondence and requests for materials should be addressed to E.D.L. (email:  
11    [elie.delestrange@hotmail.com](mailto:elie.delestrange@hotmail.com)).

12

13 **Graphical abstract**

14

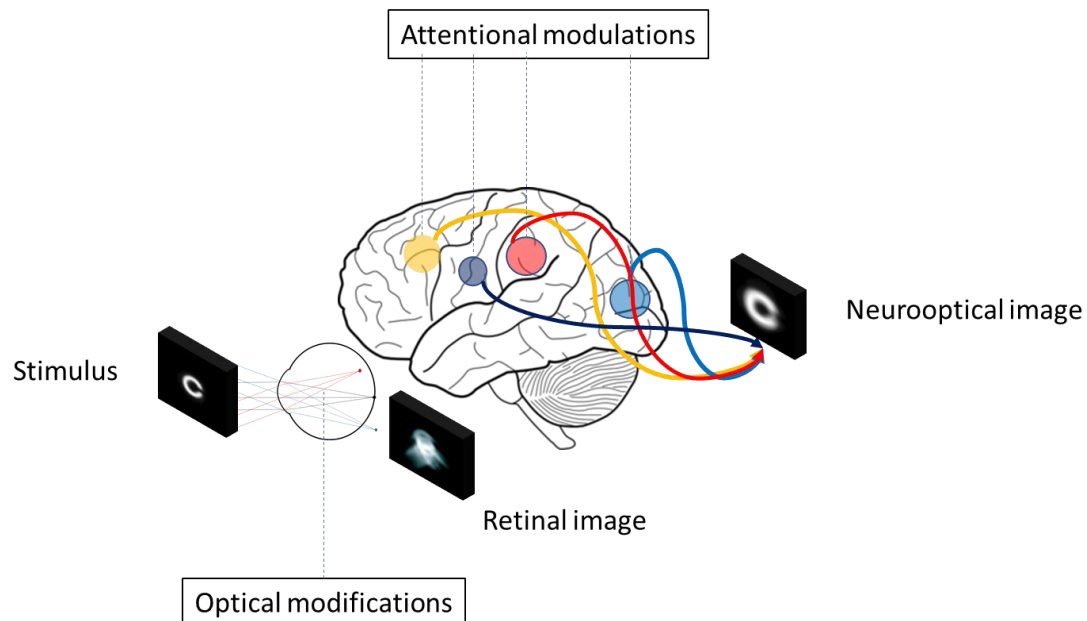

15

16 Proposed neuro-optical mechanism of transformation of stimulus by spatial attention  
17 and blur.

18

19 **Abstract**

20 **Defocus blur and spatial attention both act on our ability to see clearly over time. However,**  
21 **it is currently unknown how these two factors interact because studies on acuity resolution**  
22 **only focused on the separate effects of attention and defocus blurs. In this study, resolution**  
23 **acuity was measured along the diagonal 135°/315° with horizontal, at 8° eccentricity for**  
24 **clear and blur Landolt C images under various manipulations of covert endogenous**  
25 **attention. We observe that attention not just improves the resolution of clear stimuli, but**  
26 **also modulates the resolution of defocused stimuli for compensating the loss of resolution**  
27 **caused by retinal blur. Our results show, however, that as the degree of attention**  
28 **decreases, the differences between clear and blurred images largely diminish, thus**  
29 **limiting the benefit of an image quality enhancement. It also appeared that attention tends**  
30 **to enhance the resolution of clear images more than blurred targets, suggesting potential**  
31 **variations in the gain of vision correction with the level of attention. This demonstrates**  
32 **that the interaction between spatial attention and focus plays a role in the way we see**  
33 **things. In view of these findings, the development of adaptive (neuro-optical)**  
34 **interventions, which adjust the eye's focus to attention, may hold promise.**

35

36

37 **Significance statement** Visual technologies are now attaining a degree of extreme  
38 sophistication and diversity, which allows more comprehensive, but often complex

39 manipulations of the optical image formed onto the back of the eye. It is therefore an enigma  
40 how those fine and immersive manipulations of the sensory environment are integrated in the  
41 brain. In this study, we show that the resolving power of the eye can depend complexly on the  
42 interaction between spatial attention and focus. This discovery suggests that perception might  
43 be advantageously guided by technologies tailoring optical focus to individual attentional  
44 patterns.

45

---

46 Our ability to perceive the constituents of a visual stimulation strongly depends on the optical  
47 focus of the eye that defines the state for which the smallest spatial feature of the environment  
48 can be resolved. The control of optical focus has been one the most significant challenges of  
49 optics, and continues to drive a large number of visual technologies, such as ophthalmic visual  
50 aids (such as spectacles, contact lenses), but also display technologies (Virtual reality, vision-  
51 correcting light field display) aimed at improving and correcting the human sensory experience.  
52 Often controlling more than one visual target, those technologies have become both adaptive [1-  
53 2] and more complex [3], capable of manipulating image quality over time and space, which may  
54 broaden our experience and interaction with the environment. However, even with such  
55 heightened optical manipulation, predicting the impacts of an optical correction on visual function  
56 remains challenging due to an uncertainty as to how and to what extent optical modification  
57 affects the way retinal images are processed by the brain. Considering a capacity-limited visual  
58 system [4] and the infinite sum of information present in the visual world, augmentation of optical  
59 information could be traded off by increase amount and time for neural computation to access a  
60 neural representation, veridical with respect to the retinal image. It is known that usually not all  
61 information entering the eye is effectively processed over our visual field, with some spatial and  
62 temporal information never reaching consciousness or receiving attention [5]. Incompleteness of  
63 processing or absence of attention could limit the gain of correcting or augmenting optical signals.  
64 A vivid illustration of this phenomenon, the inattentional blindness paradigm [6], is the failure to  
65 report a simple, suprathreshold stimulus or a stimulus attribute of the visual field in the absence

66 of attention, when the eye is engaged in another attention demanding primary task. Despite this  
67 deficit, it has been shown that some amount of processing still occurs in absence of attention,  
68 when the stimulus fails to be detected [7-8]. It has been demonstrated that the effect of attention  
69 strongly depends on the type of spatial information [9], and so our visual experience may vary  
70 with the characteristics of the environment. However, the effect of movement of attention on the  
71 processing of optical signals (i.e., signals having a complex distribution of spatial frequency-  
72 dependent contrast) has received little attention. Thus, to date, it is unknown to what extent  
73 attention contributes to the perception of the fine optical signals unveiled by ocular correction. A  
74 recent examination of the relationship between blur and attention proposed that blur detection  
75 might be pre-attentively processed by the visual system [10]. Interestingly, this suggests that, even  
76 in the absence of attention, when a stimulus attribute failed to be reported, visual blur might be  
77 partly processed. Nevertheless, the degree to which blur analysis remains independent from  
78 attention deployments is still unclear. Comparing the effect of blurred and clear images under  
79 variation of attention could help determine the potential benefit of correcting visual blur under  
80 real life contexts, when attention varies. To comprehensively examine this relationship, several  
81 forms of attention and type of blur may be of interest. This study focused on the interaction  
82 between endogenous covert attention and visual blur.

83

84 In covert attention [11], sensory enhancement occurs, without eye movements, by granting  
85 priority of processing to a certain location of the visual field, which usually takes place at the  
86 expense of processes in other regions stimulating the retina. This prioritization can occur via two  
87 modes of control: The first mode, exogenous attention, is a rapid, reflex, automatic deployment  
88 of attention in response to external visual stimulation, such as an abrupt, peripheral visual event,  
89 requiring an immediate response. The second mode, endogenous attention, is under conscious,  
90 voluntary control and can be directed according to the observer's visual goal provided there is

91 sufficient time of activation. In real life, both endogenous and exogenous factors [12] affect the  
92 deployment of attention, which implies a complex interaction between environmental  
93 characteristics, neural architecture, and cognitive behaviors. A major interest of endogenous  
94 attention is that, unlike exogenous attention, it can be flexibly sustained at a position of the visual  
95 field suitable for the task requirements [13-15]. In laboratory conditions, the strength of  
96 endogenous attention can be manipulated via a central symbolic cue (e.g., an arrow pointing  
97 towards the region of the cued location), and takes about 300ms from cue onset to deploy.

98 Neurophysiological studies have shown that as attention deploys, sensitivity (contrast gain [16])  
99 or/and firing rate (response gain [17]) of neurons are increased, altering the relationship between  
100 stimulus contrast and neurons response. This can manifest in an enhancement of several  
101 perceptual tasks and stimulus properties, including resolution acuity [18-27], resolvable and  
102 apparent contrast [28-29]. Failure to adequately direct attention to environmental stimulation has  
103 been shown to drastically impair sensory performance. How does this attentional variability affect  
104 an optical ocular correction? Recent behavioral studies demonstrate the existence of a preferential  
105 enhancement of neurons tuned to high spatial frequency [30], with endogenous attentional  
106 modulation at both low and high spatial frequencies [31]. This differential effect suggests that  
107 variations of neural filtering by the focus of attention could potentially alter the *complex*  
108 appearance of broadband stimuli, having more than one spatial frequency. Such alteration could  
109 take place under various forms depending on the spatial extent of attention modulation in  
110 broadband images containing more than one spatial frequency. It is however unknown how  
111 attention varies with the complex distribution of spatial frequency pattern set by retinal blur. An  
112 account of both optical transfer function and neural transfer function could predict the  
113 neurooptical transformation of individual retinal images [32]. Unfortunately, because previous  
114 measurements of the contrast sensitivity function [31, 33] did not control the effect of blur on  
115 attention, it remains unknown how attention reshapes the neural transfer function, which is the

116 neural part determining perception independently of the optics of the eye. One of the questions  
117 that ensues is whether the modulation of attended and unattended stimulus is affected by the  
118 differentiation of ocular optical filtering across spatial frequencies and the variation of ocular blur  
119 across individuals. For example, the attenuation of high spatial frequencies in uncorrected stimuli  
120 could increase or decrease focus of attention with neural adaptation to the image the visual system  
121 decodes.

122

123 In this study, we were interested to examine whether, or not, there is a possible interaction  
124 between blur and attention on acuity, and its potential implication when correcting the eye via  
125 optical or attentional manipulations. We noted that previous studies assessing the impact of blur  
126 in acuity [34-40] systematically overlooked the effect of attention on acuity, and vice versa. To  
127 the best of our knowledge, this is the first studies that examined the joint effect of blur and spatial  
128 attention on resolution acuity. Since attention can affect differentially spatial frequencies [9,30-  
129 32], the variation of the spatial frequency distribution with retinal blurs could vary the effect of  
130 attention, and thus have practical implications when correcting retinal blurs with an ophthalmic  
131 correction. Then, to which extent, and how? Here, we hypothesized that blurred stimuli,  
132 exhibiting greater attenuation of contrast-dependent spatial frequency [41], may benefit less from  
133 attentional enhancement, as compared to clear stimuli. To test the effect of retinal defocus blur  
134 on attention, we used the “source method” proposed by Haig et al [42], which is a widely used  
135 method for assessing the visual impact of ocular aberrations [34-40], and the most optimum  
136 approach for simulating spatiotemporally-varying blurs stimuli, which cannot be simulated with  
137 adaptive optics. This study shows evidence that the deployments of attention in non-foveal  
138 locations act on the visual effect of correction by altering the acuity distinctions between clear  
139 and blur stimuli. These findings demonstrate the existence of an attentional modulation of the  
140 effect of retinal blurs, and may motivate the development of novel interventions based on the

141 adjustment of focus.

## 142 **Results**

143 Adapting a Posner’s cueing paradigm introduced by other researchers [18], resolution acuity  
144 was tested under the manipulation of blur and covert endogenous spatial attention. The visual  
145 stimuli consisted of a pair of Landolt C letters (Fig. 1, step 3; “target” and “non-target”, with  
146 different gap orientations in each) briefly displayed at two locations in the near-periphery of  
147 the visual field at 8° eccentricity. Spatial attention was manipulated using three cueing  
148 conditions (Fig. 1, step 2), whereby a cue preceded the Landolt C stimuli: (1) cued condition,  
149 in which a cue was displayed and pointed at the upcoming target Landolt C location; (2) uncued  
150 condition, in which the cue pointed at the non-target upcoming Landolt C location; and (3)  
151 neutral condition, in which two cues were simultaneously displayed and pointed at both target  
152 and non-target locations. In cued and uncued trials, observers were required to attend to a cued  
153 location (either north-west [NW] or south-east [SE]) while fixating on a small central cross. In  
154 neutral trials, observers were required to spread their attention and focus on both locations (i.e.,  
155 NW and SE). At the end of the stimulus presentation sequence, the location of the target Landolt  
156 C (Fig. 1, step 4) was indicated by a response cue, which consists of a central line symbol  
157 pointing towards one of the two stimuli.

158 The visual task was to identify the orientation of the gap in the “target” Landolt C (6AFC; see  
159 Methods for details), as indicated by the response cue. Visual acuity performance was measured  
160 under both clear and blurred conditions (Fig. 1, step 3). The gap size was controlled using an  
161 adaptive 1-down-1-up staircase procedure. A computerized image processing technique was  
162 employed to simulate the effects of a moderate amount of optical defocus on the retinal image  
163 of the Landolt C stimulus [43] (defocus blur, two waves of RMS wavefront error, about 1.25  
164 diopters; see Methods for details). We chose to use a *clear* attentional cue and fixation stimuli  
165 in all the conditions so that the magnitude of the attention deployment was identical when

166 comparing clear and blurred target conditions. There was a total of 12 interleaved staircases,  
167 for a total of 12 conditions (i.e., two retinal locations x three cue conditions x two blur levels).  
168 In addition to visual acuity (VA), response time (RT) was also measured.

169 Eleven young adults with corrected-to-normal vision participated. The visual acuity and  
170 response time data were processed using a three-way repeated measures analysis of variance  
171 (RANOVA) test (retinal location: NW and SW; visual blur: clear and blurred; spatial cueing:  
172 cued, uncued, and neutral), and post-hoc pairwise comparisons were performed with the  
173 Bonferroni correction using SPSS.

174 **Spatial location.** Spatial location of the target had a statistically significant effect on the  
175 overall performance for RT (three-way RANOVA:  $F(1,10)=5.473$   $p=.041$ ,  $\eta^2=0.364$ ), but not  
176 for VA (three-way RANOVA:  $F(1,10)=2.313$   $p=.159$ ,  $\eta^2=0.188$ ). There was no significant  
177 interaction between spatial cueing effect and spatial location for either RT (three-way  
178 RANOVA RT:  $F(1.184,20)=3.227$ ,  $p=.094$ ,  $\eta^2=0.244$ ) or VA (three-way RANOVA VA:  
179  $F(2,20)=.081$   $p=.922$ ,  $\eta^2=0.008$ ), suggesting that spatial cueing effect was little affected by  
180 the position of the target along the diagonal ( $135^\circ/315^\circ$  with horizontal).

181 **Spatial cueing.** Spatial cueing was found to significantly influence VA (Fig. 2a, three-way  
182 RANOVA:  $F(1.109,11.091)=21.962$ ,  $p=0.001$ ,  $\eta^2=0.687$ ), as reported previously [18-27], and  
183 response time (Fig. 2c, three-way RANOVA:  $F(2,20)=28.919$ ,  $p<0.001$ ,  $\eta^2=0.743$ ). Visual  
184 acuity performance was superior for cued stimuli when compared to that for neutral stimuli  
185 (Bonferroni post-hoc test VA: mean difference=1.981, arcmin,  $p=0.012$ ; RT: mean difference=-  
186 0.052 ms,  $p=0.019$ ) or uncued stimuli (Bonferroni post-hoc test VA: mean difference=5.963,  
187 arcmin,  $p=0.002$ ; RT: mean difference=0.160 ms,  $p=0.001$ ). Using the neutral condition as a  
188 reference, the data sets were replotted as changes in visual acuity in Fig. 2b and changes in  
189 response time in Fig. 2d. Note that positive values represent an increase in visual acuity  
190 performance, and vice versa. The overall cost of attending to an incorrect location was greater



191 than the benefit of attending to a correct location by two-fold for both RT and VA.

192 **Effect of spatial cueing on clarity** We replotted in Fig. 3 the spatial cueing data for both clear  
193 and blurred targets showing that, under both conditions, VA and RT increased under the cued  
194 condition (Bonferroni post-hoc test VA: blurred target: mean difference = 1.528,  $p=0.02$ ; clear  
195 target: mean difference = 2.433,  $p=0.017$ ) and decreased under the uncued condition  
196 (Bonferroni post-hoc test VA: blurred target: mean difference = 3.855,  $p=0.002$ ; clear target:  
197 mean difference = 4.109,  $p=0.003$ ), when compared with the neutral cue condition.  
198 Nevertheless, visual blur significantly influenced VA (three-way RANOVA:  $F(1,10)=54.203$ ,  
199  $p<0.001$ ,  $\eta^2=0.844$ ). Notably, a significant interaction was found between visual blur and  
200 spatial cueing for VA (three-way RANOVA VA:  $F(2,20)=3.586$ ,  $p=0.047$ ,  $\eta^2=0.264$ ), but not  
201 for RT (3-way RANOVA:  $F(2,20)=0.142$ ,  $p=0.869$ ,  $\eta^2=0.014$ ). A significant impact of blur  
202 (Fig. 3e,  $VA_{\text{blur}}-VA_{\text{clear}}$ ) was observed for both cued and neutral conditions, but not for the  
203 uncued condition (Bonferroni post-hoc test VA: cued: mean difference = 1.857 arcmin,  $p<0.001$ ;  
204 neutral: mean difference= 0.952 arcmin,  $p=0.015$ ; uncued: mean difference= 0.698, arcmin,  
205  $p=0.074$ ). Most remarkably, the suboptimal attentional conditions (i.e., neutral and uncued)  
206 reduced the difference in resolution between blurred and clear stimuli, suggesting that as  
207 attention is diverted from the resolution task at hand, visual differences between stimuli having  
208 distinct focus are no longer processed.

209 **Existence of a neuro-optical balance.** This equalization of in and out of focus stimulation  
210 reveals that the alteration and augmentation of acuity involve an interaction between optical  
211 quality of the eye and the movement of attention over the visual field. As depicted in Fig. 4, a  
212 paired sampled t-test shows that a defocus system under full attention (attended blur image:  
213  $6.72 \pm 1.42$ ) exhibits superior performance than a perfectly focused system with reduced  
214 attention (unattended clear image:  $11.40 \pm 5.14$ );  $t(21) = 4.58$ ,  $p<0.001$ . This indicates that,  
215 by increasing a person's attention, it is possible to compensate for a large drop in optical

216 resolution. Similarly, a defocus system under full attention (attended blur image:  $6.716 \pm$   
217  $1.417$ ), has similar performance than a focused system with reduced attention (neutral clear  
218 image:  $7.292 \pm 3.347$ ); as a paired sampled t-test shows no statistical difference  $t(21) = 1.04$ ,  
219  $p=0.312$ . This highlights that for a given acuity level, it is possible to have varying combinations  
220 of attention and focus. This highlights that natural modulation of attention (e.g., occurring under  
221 prolonged sustained attention [44-46]) can be counterbalanced by an increase in optical  
222 resolution.

223 **Effect of clarity on spatial cueing** Interestingly, the cueing gain (Fig. 5,  $VA_{\text{cued}}/VA_{\text{neutral}}$ ) was  
224 significantly augmented in clear targets compared to blurred targets (Paired-samples t-test:  
225 mean difference: 0.290, paired  $t(10)=2.37$ ,  $p=0.039$ ) whereas the cueing cost (Fig. 5a  
226  $VA_{\text{uncued}}/VA_{\text{neutral}}$ ) did not appear to be influenced by the blurring condition (Paired-samples t-  
227 test: mean difference: -0.02, paired  $t(10)=-0.061$ ,  $p=0.557$ ). The absence of difference in acuity  
228 reduction (from the neutral baseline) for blurred and clear targets is compatible with the idea  
229 that, below a certain level of attention (here, referring to the neutral conditions), the information  
230 modulated by attention in clear targets becomes similar to that for blurred targets. On the other  
231 hand, the total cueing effect was stronger for clear targets than blurred targets, which revealed  
232 that spatial attention enhanced acuity more with clear than blurred vision. Albeit speculative, a  
233 plausible explanation is that the effective width of the attentional filter is broader for clear vision,  
234 because of the augmentation of the suprathreshold components of the image (e.g., towards the  
235 higher spatial frequencies) on which attention can operate, as illustrated in Fig. 6. Those findings  
236 indicate that the efficiency of attention deployment is somewhat dependent on the image quality  
237 of the human eye at a given location. If attention do depend on the retinal blurred image, the  
238 particular distribution of blur across the visual field, which is known to vary with refractive  
239 populations, could matter in the distribution of spatial attention. This asks whether the retinal  
240 blurs resulting from the eye growth are merely an outcome of biological constraints, or could

241 involve some neural feedback mechanisms involved in the regulation of the attentional  
242 resources?

243

244 **Simulated refractive gain.** The data were replotted in terms of visual acuity gain  
245 ( $VA_{\text{blur}}/VA_{\text{clear}}$ ) as shown in Fig. 7a. A significant decrease (one-way RANOVA,  $F(2,20)=7.697$ ,  
246  $p=0.003$ ,  $\eta^2=0.435$ ) in refractive gain by a factor of approximately 1.26 and 1.19 was found  
247 under neutral and uncued conditions, respectively, compared to the cued condition, indicating  
248 that a certain degree of attention is required for attaining a benefit of sufficient value from blur  
249 correction. Fig. 7b shows the simulated refractive gain variations associated with modulation  
250 in attention from the neutral condition. It is worth noting that, under suboptimal attentional  
251 conditions, the correction of retinal blur may not increase acuity although stimuli are still  
252 detected. This finding identifies attention as a prerequisite of vision enhancement in the  
253 perifovea.

254

255

---

## 256 **Discussion**

257 In this study, it was demonstrated that acuity depends on both attentional and optical factors,  
258 throwing light, for the first time, on the way resolution acuity is modulated by variations in  
259 endogenous covert attention and the eye's focus (Fig. 2-4, 6-7). This complements a large  
260 number of studies in the literature that have till now discounted the interaction between  
261 attention and optics, focusing only on the separate effects of attention [18-32] and ocular optics  
262 [34-40] per se in acuity resolution.

263

264 **Tolerance to retinal blurs** We showed that processing of blur is strongly influenced by the  
265 level of attention, and so not simply automatically processed [10]. Specifically, it was

266 determined that attention not only improved images that are sharp [18-27], but can also  
267 drastically improved the resolution of degraded retinal images (Fig. 2a-c) to provide more  
268 tolerance to blur. This tolerance suggests the possibility of an adaptive compensation by  
269 attention of the retinal blurs degrading vision, which, might enable the eye to rely less on the  
270 optical ocular quality. This may be particularly useful to adapt the unwanted spatiotemporal  
271 blurs of the visual field that are caused by the motion of the eye and visual targets. Besides, it  
272 could allow relaxation of the constraint on optical quality required to achieve a certain  
273 performance when recomposing these blurs (as is the trend with progressive addition lenses).  
274 On the other hand, under diminished attention (Fig. 3e), an optical enhancement could present  
275 the sure advantage to providing greater acuity compared to a blurred image. A riveting question  
276 remains how optical modulations affect our attentional responses and resources.

277 **Attentional limit to supervision** Our results reveal that blurring does modulate the impact of  
278 attention. We show that attention boosts more acuity resolution in clear stimuli than blurred  
279 stimuli (Fig. 5). While this seems to accord with the idea that attention enhance more retinal  
280 stimuli having the highest level of details [30], it is also plausible that the increased contrast  
281 across spatial frequencies in clear stimuli favor attentional modulation. Supposing that clear  
282 retinal stimuli are more attentionally demanding, ocular blurs brought by the eye growth could  
283 be a way for the visual system to regulate the deployment of attentional resources across the  
284 visual field, and adjust the cues of the environment. A practical, and potentially interesting,  
285 consequence of a differential attentional modulation is that the decrease of attention can alter  
286 the resolution gain of optical correction (Fig. 7): the conditionality of beneficial effects of  
287 correction in daily activities can have certain implications for visual technologies aimed at  
288 augmenting visual resolution. For instance, a super-resolved optical system [40] may only be  
289 effective if subjects allocate sufficient attentional resources to a given location. Such  
290 contingency of performance requires an individual's attentional pattern to be considered when

291 determining the level of correction. Indeed, the observed effect of attention and blur and their  
292 interaction could vary between individuals because of several factors, including ocular  
293 aberration, neural sampling, neural adaptation but also maybe individual attentional patterns.

294 **Dynamic focus correction.** An expected, but seminal, finding of this study is that a given  
295 level of acuity can involve different combinations of attention and focus (Fig. 4) -that is, a  
296 focused system with reduced attention can perform closely to a defocused system under full  
297 attention. This provides evidence that changes in attention might be balanced by external or/and  
298 changes in optical focus, and vice-versa. Given the incessant modulation of attention with time  
299 [15], environmental settings [12], but also among individuals [47], the use of adaptive optical  
300 technology could constitute a unique opportunity to adjust the modulation of attention at the  
301 optical level. While such optical compensation is not feasible using standard static corrections,  
302 given their fixed focus, several emerging technologies, such as spectacles-free display [1] and  
303 adaptive optics spectacles [2], show the potential to dynamically adjust the level of acuity to  
304 the movement of attention via an adjustable focus, which could thus timely control the  
305 resolution of the neural images. While a dynamic optical correction might be simply based on  
306 the person's feedback, in the case of an automatic optical focus, it would require the ability -  
307 not without challenges- to continuously sense and decode the eye responses to access the  
308 temporal variations of attention. Combining real-time eye-tracking and control of the optical  
309 focus of neural images may open up unique and exciting horizons to respond to individual  
310 visual needs, which hold promises for the development of visual aids capable of dynamically  
311 linking optical inputs and neural outputs.

312 **Future development.** This study has some limitations. First, the control of ocular aberrations  
313 in the extrafoveal regions of the retina was not possible, as, to date, there is no visual simulator  
314 capable to correct aberration over a wide viewing angle. Visual simulator correcting the  
315 aberrations of the eye are restricted by the isoplanatic patch of the eye to a small visual angle

316 (of about 1-2degrees) that allows testing only one peripheral location at once [48]. This severely  
317 limits the manipulation of spatial attention across distant locations of the visual field. By using  
318 an adaptive optical system incorporating several deformable mirrors and wavefront sensors, it  
319 may be possible in the future to enlarge the angular extent of adaptive ocular correction of the  
320 eye [49], and so the limitation of conventional visual simulators, which incorporate only a  
321 single deformable mirror. The use of a wide field AO would help, not just to simulate different  
322 retinal blurs, but also compensate for the aberrations of the eye. Such compensation is essential  
323 to investigate a possible effect of neural adaptation to natural peripheral blurs in spatial attention.  
324 For example, sensitivity to the simulated blurred images could be influenced by individual  
325 differences in natural peripheral blurs the eye may be adapted to [50]. Nevertheless, little is  
326 known about the degree of adaptation to *natural* peripheral aberrations, though recent studies  
327 in Yoon Lab suggests that adaptation to defocus could differ with individual refractive errors  
328 in myopes and emmetropes [51]. Further works will be required to elucidate this. A second  
329 limitation of the study is that the interleaved test was restricted to a limited number of retinal  
330 conditions. It is plausible that the joint effect of attention and blur may vary as the characteristic  
331 of ocular blur changes across the visual field, but a comprehensive understanding of these  
332 parameters could involve controlling for the variation of ocular blur across eccentricities, as  
333 recently performed in our Lab via a multiscale visual simulator [52]. To avoid the confounding  
334 effects of the individual ocular aberrations on the simulated retinal blurred images, a  
335 sufficiently large blur, producible on the display, was considered, excluding blur conditions  
336 with very small and large amounts of retinal blurs. Other limitations could involve the  
337 complexity of the stimulus and task. For instance, we show in a recent study [53] that, when  
338 individuals perform a simple detection task, the effect of exogenous spatial attention on  
339 simulated blurred images is small, suggesting a plausible decrease of interaction between blur  
340 and attention as the attentional demand required by the task diminishes. Given that exogenous

341 and endogenous attentional filters involve different neuronal pathways, the dynamic of  
342 attention might influence an interaction between blur and attention. Further works will be  
343 needed to elucidate how these factors affect the processing of blur processing by attention.

344

345

---

## 346 **Conclusion**

347 In sum, our results proved, for the first time, a joint effect of optical and attentional factors on  
348 acuity resolution, showing that both attention and the eye's optics matters in the way we  
349 perceive things: both the degree of attention and optical correction vary the acuity resolution of  
350 the visual system, which potentially allows distinct (neuro-optical) combinations for achieving  
351 a given visual resolution. The interaction between those two visual factors is, however, more  
352 complex than thought, as acuity enhancement is not equal for focused and defocused images,  
353 the movements of attention could modulate an optical correction of the eye. This suggests an  
354 important avenue of exploration for adaptive optical technologies. Indeed, the neuro-optical  
355 interaction investigated in the present study for localized, defocused images is one only tiny  
356 facet of the iceberg, with a more important question perhaps, that is: how, and to which extent,  
357 a person's attention interact with the patterns of blurring on the retina? We believe that further  
358 research utilizing new optical advances to control ocular blurs and attention over the entire  
359 visual field could contribute to unfolding this mystery. Future works shall examine how the  
360 interaction that may link the brain and the optics of the eye spreads across the visual field in  
361 real-world contexts.

362

---

## 363 **Methods**

364 **Experimental design.** Subjects were asked to fixate on a small cross displayed at the center  
365 of the monitor screen (Fig. 1, “+”; size,  $0.5^\circ \times 0.5^\circ$ ). The endogenous covert attention of the  
366 subject was manipulated using a central cue preceding the visual stimuli. On cued and uncued

367 trials, a central cue was displayed (size, 18 x 0.6 arcmin; exposure time, 293 ms), pointing at  
368 either one of the two upcoming Landolt C locations, to which the observer was required to  
369 allocate attention. In neutral trials, two central cues were displayed, pointing at both upcoming  
370 Landolt C locations. Two Landolt Cs (“target” and “non-target”), with different gap orientations,  
371 were then presented simultaneously after a 300 ms inter-stimulus-interval. At the end of the  
372 presentation sequence, a central line symbol (size, 18 x 0.6 arcmin) was displayed to point the  
373 location of the target Landolt C.

374

375 Three cue conditions were tested: (1) in the cued condition, the cue pointed towards the target  
376 Landolt C location; (2) in the uncued condition, the cue pointed towards the non-target Landolt  
377 C location; and (3) in the neutral condition, two cues were displayed, which pointed towards  
378 both target and non-target locations. Each cue condition was displayed for one-third of the  
379 response trials in each session (cued: uncued: neutral = 1:1:1). It should be noted that the  
380 participants were required to direct their attention as instructed by the cue(s), and that they were  
381 not informed of the proportions of the three cue conditions.

382 The experimental procedures were approved by the University Committee for the Protection  
383 of Human Subjects (HSEARS20170103003), and the research was conducted according to the  
384 principles expressed in the Declaration of Helsinki. Informed consent was obtained from each  
385 participant. All those involved, except two of the observers, the authors J.T.L and D.L.E, were  
386 inexperienced with psychophysical procedures and not informed of the purpose of the  
387 experiments.

388

389 **Simulated defocus blur.** Visual performance was assessed under both clear (zero blur) and  
390 blurred (defocus blur, 2 waves of RMS wavefront error, about 1.25D) conditions. Note that the  
391 blurred Landolt C stimuli were graphically generated by convolution of the two-dimensional



392 luminance profile of the Landolt C and a point spread function,  $h(x, y)$ , of a 5 mm pupil ( $2r$ ):

393 
$$h(x, y) = \|F[g(u, v)]\|^2$$

394 
$$g(u, v) = A(u, v) \exp\left[\frac{i2\pi}{\lambda} W(u, v)\right]$$

395 where  $F$  denotes Fourier transform,  $A(u, v)$  denotes pupil function,  $W(u, v)$  denotes

396 wavefront aberration described by a set of Zernike polynomials [54]. In this study, the visual

397 stimuli (i.e. Landolt C letters) were presented in black against a green background, and therefore

398  $\lambda$  was set to 550 nm. The wavefront aberration was calculated from the Zernike defocus

399 polynomials  $Z_2^0$ , as:

400 
$$W_{def}(u, v) = c_2^0 Z_2^0(u, v)$$

401 The amount of defocus used in these experiments is given by [55]:

402 
$$c_2^0 = \frac{M r^2}{4\sqrt{3}}$$

403 where  $M$  denotes the spherical equivalent in diopters,  $r$  the radius of the simulated pupil.

404 **Visual acuity measurement.** Eleven young adults with corrected-to-normal vision (age 24

405 - 39; VA 6/6 or better in each eye) performed a Landolt C acuity task at two locations in the

406 near-peripheral visual field (Fig. 1, 8° eccentricity; quadrant, NW and SE; along 135°/315° with

407 horizontal). The placement of the pair of stimuli at the intercardinal locations aimed to minimize

408 field performance and attentional asymmetries. The visual task was to identify the orientation

409 of a gap in the “target” Landolt C (6AFC: 30°, 90°, 150°, 210°, 270°, 330°). The stroke width

410 was one-fifth of the Landolt C size. The stimulus exposure duration was 33 ms. Viewing was

411 binocular.

412 An interleaved 1-down-1-up staircase procedure that converged on the 50 % correct level

413 (adjusted for 6AFC, guess rate=1/6) was used to control the gap size and measure the visual

414 acuity threshold. There was a total of 12 interleaved staircases for various stimulus conditions

415 (i.e., three cue conditions x two locations x two blur levels). The acuity test was repeated a total

416 of 15 times for each stimulus condition over five sessions (approximately 5400 response trials

417 in total), and the average value of the threshold measurements was taken as visual acuity.  
418 Observer responded using a keyboard and audio feedback was provided after each response.  
419 The time taken for an observer to respond after the offset of the Landolt C stimuli was measured  
420 as response time. Only response taking place after the response cue offset were considered,  
421 response time longer than 1 second were excluded.

422 A 32-inch Dell LCD monitor (screen resolution, 3840 x 2160; background luminance, 25  
423  $\text{cd/m}^2$ ; contrast,  $\sim 100\%$ ) was used to display visual stimuli. Viewing distance was 1m.  
424 Throughout the experiment, an Eye tracker (Tobbi TX 300) monitored eye fixation, from the  
425 onset of the cue to the offset of the target. Trials with unstable fixation (eye movements  $> 2^\circ$ )  
426 were discarded.

427

428

---

## 429 **References**

- 430 1. Huang, F. C., Wetzstein, G., Barsky, B. A. & Raskar, R. Eyeglasses-free Display: Towards Correcting  
431 Visual Aberrations with Computational Light Field Displays. *Acm T Graphic* 33 (2014). doi:Artn  
432 5910.1145/2601097.2601122
- 433 2. Hasan, N., Banerjee, A., Kim, H. & Mastrangelo, C. H. Tunable-focus lens for adaptive eyeglasses.  
434 *Opt Express* 25, 1221-1233 (2017). doi:10.1364/OE.25.001221
- 435 3. Krueger, R.R., Applegate, R.A., MacRae, S. Wavefront Customized Visual Correction: The Quest for  
436 Super Vision II. (Thorofare, NJ: Slack Inc. , 2004).
- 437 4. Lennie, P. The cost of cortical computation. *Curr Biol* 13, 493-497 (2003).  
438 doi:10.1016/S0960-9822(03)00135-0
- 439 5. Desimone, R. & Duncan, J. Neural mechanisms of selective visual attention. *Annu Rev Neurosci* 18,  
440 193-222 (1995). doi:10.1146/annurev.ne.18.030195.001205
- 441 6. Rock, I., Linnett, C. M., Grant, P. & Mack, A. Perception without Attention - Results of a New  
442 Method. *Cognitive Psychol* 24, 502-534 (1992). doi:Doi 10.1016/0010-0285(92)90017-V
- 443 7. Moore, C. M. & Egeth, H. Perception without attention: Evidence of grouping under conditions of  
444 inattention. *J Exp Psychol Human* 23, 339-352 (1997). doi:Doi 10.1037//0096-1523.23.2.339
- 445 8. Scholte, H. S., Witteveen, S. C., Spekreijse, H. & Lamme, V. A. F. The influence of inattention on  
446 the neural correlates of scene segmentation. *Brain Res* 1076, 106-115 (2005).  
447 doi:10.1016/j.brainres.

- 448 9. Lee, D. K., Koch, C. & Braun, J. Spatial vision thresholds in the near absence of attention. *Vision*  
449 *Research* 37, 2409-2418, doi:Doi 10.1016/S0042-6989(97)00055-2 (1997).
- 450 10. Loschky, L. C. et al. Blur detection is unaffected by cognitive load. *Vis Cogn* 22, 522-547,  
451 (2014). doi:10.1080/13506285.2014.884203
- 452 11. Posner, M. I., Snyder, C. R. R. & Davidson, B. J. Attention and the Detection of Signals. *J Exp*  
453 *Psychol Gen* 109, 160-174(1980). doi:Doi 10.1037//0096-3445.109.2.160
- 454 12. Corbetta, M., Patel, G. & Shulman, G. L. The reorienting system of the human brain: from  
455 environment to theory of mind. *Neuron* 58, 306-324 (2008). doi:10.1016/j.neuron.2008.04.017
- 456 13. Muller, H. J. & Rabbitt, P. M. A. Reflexive and Voluntary Orienting of Visual-Attention - Time  
457 Course of Activation and Resistance to Interruption. *J Exp Psychol Human* 15, 315-330, doi:Doi  
458 10.1037/0096-1523.15.2.315 (1989).
- 459 14. Yantis, S. & Jonides, J. Abrupt Visual Onsets and Selective Attention - Voluntary Versus  
460 Automatic Allocation. *J Exp Psychol Human* 16, 121-134, doi:Doi 10.1037//0096-1523.16.1.121  
461 (1990).
- 462 15. Nakayama, K. & Mackeben, M. Sustained and transient components of focal visual attention.  
463 *Vision Res* 29, 1631-1647 (1989).
- 464 16. Reynolds, J. H., Pasternak, T. & Desimone, R. Attention increases sensitivity of V4 neurons.  
465 *Neuron* 26, 703-714 (2000). doi:Doi 10.1016/S0896-6273(00)81206-4.
- 466 17. Lee, J. & Maunsell, J. H. The effect of attention on neuronal responses to high and low contrast  
467 stimuli. *J Neurophysiol* 104, 960-971 (2010). doi:10.1152/jn.01019.2009.
- 468 18. Montagna, B., Pestilli, F. & Carrasco, M. Attention trades off spatial acuity. *Vision Research* 49,  
469 735-745, doi:10.1016/j.visres.2009.02.001 (2009).
- 470 19. Chan, C., Smith, G. & Jacobs, R. J. Simulating refractive errors: source and observer methods. *Am*  
471 *J Optom Physiol Opt* 62, 207-216 (1985).
- 472 20. Shiu, L.P., Pashler, H. Negligible effect of spatial precuing on identification of single digits. *J. Exp.*  
473 *Psychol. Hum. Percept. Perform.* 20, 1037-1054 (1994).
- 474 21. Shiu, L.P., Pashler, H. Spatial attention and vernier acuity. *Vision Res.* 35, 337-343 (1995).
- 475 22. Yeshurun, Y., Carrasco, M. Spatial attention improves performance in spatial resolution  
476 tasks. *Vision Res.* 39, 293-306 (1999).
- 477 23. Yeshurun, Y., Carrasco, M. Spatial attention improves performance in spatial resolution  
478 tasks. *Vision Res.* 39, 293-306 (1999). doi:10.1016/s0042-6989(98)00114-x
- 479 24. Shalev, L., Tsal, Y. Detecting gaps with and without attention: Further evidence for attentional  
480 receptive fields. *European Journal of Cognitive Psychology.* 14, 3-26 (2002).
- 481 25. Carrasco, M., Williams, P.E., Yeshurun, Y. Covert attention increases spatial resolution with or  
482 without masks: support for signal enhancement. *J Vis.* 2, 467-479 (2002). doi:10.1167/2.6.4
- 483 26. Golla, H., Ignashchenkova, A., Haarmeier, T., Their, P. Improvement of visual acuity by spatial  
484 cueing: a comparative study in human and non-human primates. *Vision Res.* 44, 1589-1600 (2004).  
485 doi:10.1016/j.visres.2004.01.009

- 486 27. Yeshurun, Y., Carrasco, M. The effects of transient attention on spatial resolution and the size of the  
487 attentional cue. *Percept. & Psychophys.* 70, 104–113 (2008).
- 488 28. Carrasco, M., Ling, S. & Read, S. Attention alters appearance. *Nat Neurosci* 7, 308-313,  
489 doi:10.1038/nn1194 (2004).
- 490 29. Liu T, Abrams J, Carrasco M. Voluntary attention enhances contrast appearance. *Psychol*  
491 *Sci.* ;20(3):354-362 (2009). doi:10.1111/j.1467-9280.2009.02300.x
- 492 30. Anton-Erxleben, K. & Carrasco, M. Attentional enhancement of spatial resolution: linking  
493 behavioural and neurophysiological evidence. *Nat Rev Neurosci* 14, 188-200 (2013).  
494 doi:10.1038/nrn3443.
- 495 31. Michael Jigo, Marisa Carrasco; Differential impact of exogenous and endogenous attention on  
496 the contrast sensitivity function across eccentricity. *Journal of Vision* 20(6):11 (2020).  
497 doi: <https://doi.org/10.1167/jov.20.6.11>.
- 498 32. Watson, A. B. & Ahumada, A. J. Modeling acuity for optotypes varying in complexity. *J Vis* 12,  
499 doi:10.1167/12.10.19 (2012).
- 500 33. Carrasco, M., Penpeci-Talgar, C. & Eckstein, M. Spatial covert attention increases contrast  
501 sensitivity across the CSF: support for signal enhancement. *Vision Research* 40, 1203-1215, doi:  
502 10.1016/S0042-6989(00)00024-9 (2000).
- 503 34. Applegate, R. A., Ballentine, C., Gross, H., Sarver, E. J., Sarver, C. A. Visual acuity as a  
504 function of zernike mode and level of root mean square error. *Optom. & Vis. Sc.* 80, 97–105  
505 (2003).
- 506 35. Thibos, L.N., Hong, X., Bradley, A., Applegate, R.A. Accuracy and precision of objective  
507 refraction from wavefront aberrations. *J. Vis.*, 4, 329-351 (2004).
- 508 36. Marsack, J., Thibos, L.N., Applegate, R.A. Metrics of optical quality derived from wave  
509 aberrations predict visual performance. *J. Vis.*, 4, 322-328 (2004).
- 510 37. Villegas, E.A., Alcón, E., Artal, P. Optical Quality of the Eye in Subjects with Normal and  
511 Excellent Visual Acuity. *Invest. Ophthalmol. Vis. Sci.* 49:4688-4696 (2008). doi:  
512 10.1167/iovs.08-2316.
- 513 38. Ravikumar A., Sarver E. J., Applegate R. A. Change in visual acuity is highly correlated with  
514 change in six image quality metrics independent of wavefront error and/or pupil diameter. *J. Vis.*  
515 12, 1–13 (2012).
- 516 39. Ravikumar, A., Marsack, J. D., Bedell, H. E., Shi, Y., & Applegate, R. A. Change in visual  
517 acuity is well correlated with change in image-quality metrics for both normal and keratoconic  
518 wavefront errors. *J. Vis.* 13, 1–16 (2013).
- 519 40. Liang, J. Z., Williams, D. R. & Miller, D. T. Supernormal vision and high-resolution retinal imaging  
520 through adaptive optics. *J Opt Soc Am A* 14, 2884-2892, doi:Doi 10.1364/Josaa.14.002884 (1997).
- 521 41. Artal, P. (2014). Optics of the eye and its impact in vision: A tutorial. *Advances in Optics and*  
522 *Photonics*, 6, 340–367.

- 523 42. Burton GJ, Haig ND. Effects of the Seidel aberrations on visual target discrimination. *J Opt Soc*  
524 *Am A*. 1984;1(4):373-385. doi:10.1364/josaa.1.000373
- 525 43. Chan, C., Smith, G. & Jacobs, R. J. Simulating refractive errors: source and observer methods.  
526 *Am J Optom Physiol Opt* 62, 207-216 (1985).
- 527 44. Grier, R. A. et al. The vigilance decrement reflects limitations in effortful attention, not  
528 mindlessness. *Hum Factors* 45, 349-359(2003). doi:10.1518/hfes.45.3.349.27253.
- 529 45. Warm, J. S., Parasuraman, R. & Matthews, G. Vigilance requires hard mental work and is stressful.  
530 *Hum Factors* 50, 433-441 (2008). doi:10.1518/001872008X312152.
- 531 46. Szalma, J. L. et al. Effects of sensory modality and task duration on performance, workload, and  
532 stress in sustained attention. *Hum Factors* 46, 219-233 (2004). doi:10.1518/hfes.46.2.219.37334
- 533 47. Brefczynski-Lewis, J. A., Datta, R., Lewis, J. W. & DeYoe, E. A. The topography of visuospatial  
534 attention as revealed by a novel visual field mapping technique. *J Cogn Neurosci* 21, 1447-1460,  
535 (2009). doi:10.1162/jocn.2009.21005
- 536 48. Nowakowski M, Sheehan M, Neal D, Goncharov AV. Investigation of the isoplanatic patch and  
537 wavefront aberration along the pupillary axis compared to the line of sight in the eye. *Biomed Opt*  
538 *Express*. 3(2):240-258 (2012) . doi:10.1364/BOE.3.000240
- 539 49. J. Thaug, P. Knutsson, Z. Popovic, M. Owner-Petersen, Dual-conjugate adaptive optics for wide-  
540 field high-resolution retinal imaging, *Opt. Express* 17 (6) 4454-4467 (2009).
- 541 50. Zheleznyak L, Barbot A, Ghosh A, Yoon G. Optical and neural anisotropy in peripheral vision. *J*  
542 *Vis*;16(5):1 (2016) . doi:10.1167/16.5.1
- 543 51. Ghosh A, Zheleznyak L, Barbot A, Jung H, Yoon G. Neural adaptation to peripheral blur in  
544 myopes and emmetropes. *Vision Res*.132:69-77 (2017) . doi:10.1016/j.visres.2016.09.017
- 545 52. De Lestrang-Angineur E, Kee C-s Testing impacts of global blur profiles using a multiscale  
546 simulator. *Heliyon* 6 e04153 (2020).
- 547 53. De Lestrang-Angineur E, Kee C-s Investigation of the impact of blur under mobile attentional  
548 orientation using a vision simulator. *PLoS ONE* 15(6): e0234380 (2020).  
549 <https://doi.org/10.1371/journal.pone.0234380>
- 550 54. Thibos, L. N., Applegate, R. A., Schwiegerling, J. T., Webb, R. & Members, V. S. T. Standards for  
551 reporting the optical aberrations of eyes. *J Refract Surg* 18, S652-S660 (2002).
- 552 55. Thibos, L. N., Hong, X., Bradley, A., Cheng, X. "Statistical variation of aberration structure and  
553 image quality in a normal population of healthy eyes," *J Opt Soc Am A* 19, 2329-2348 (2002).
- 554 56.

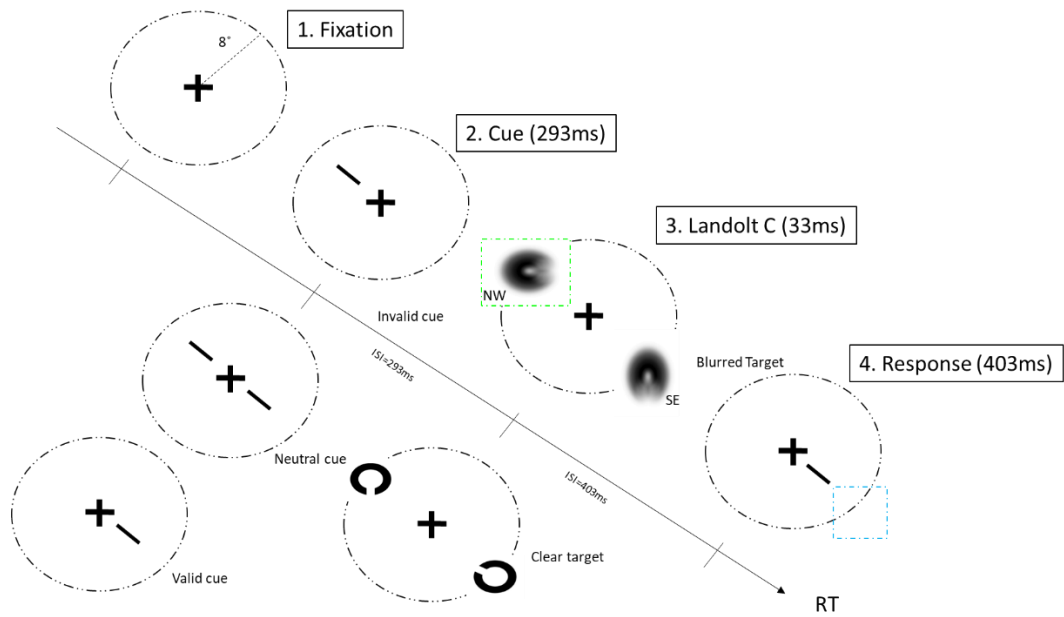

555  
556 Figure 1

557

558 a

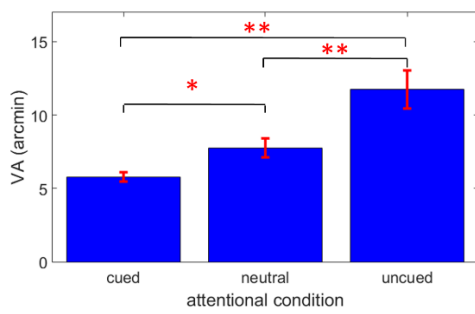

559

560 c

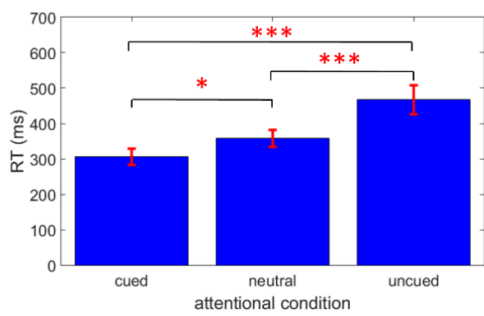

561

562 Figure 2

563 a

b

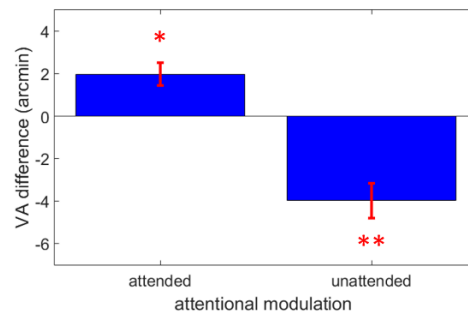

d

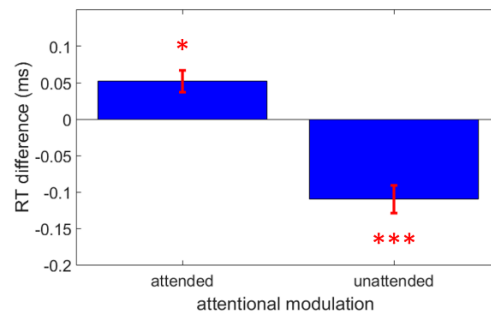

b

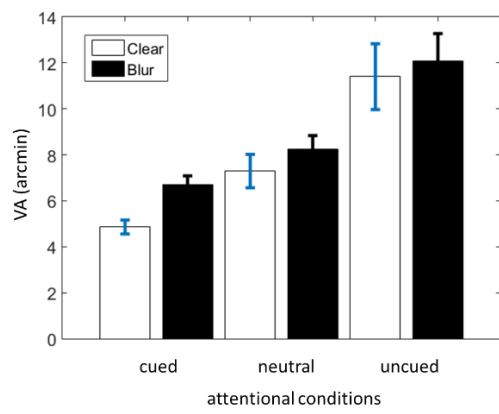

564

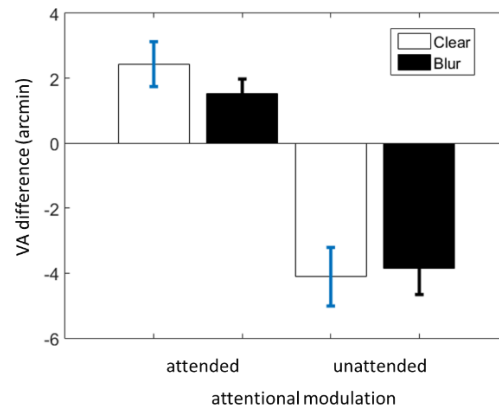

565 c

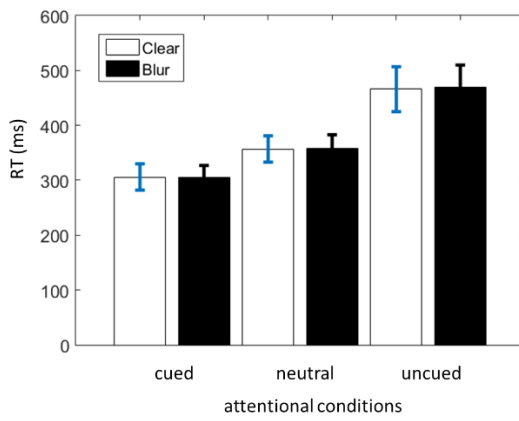

566

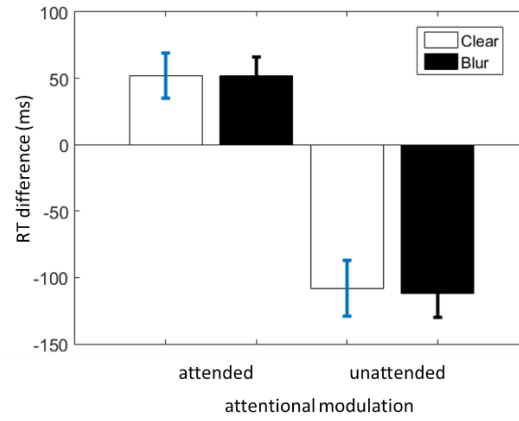

567 e

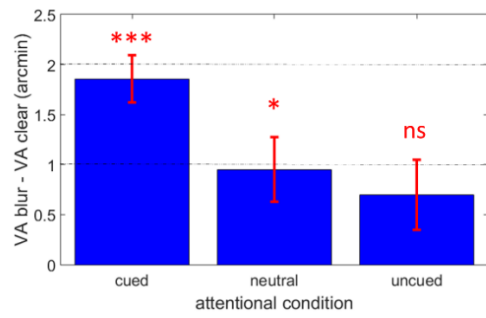

568

569 Figure 3

570

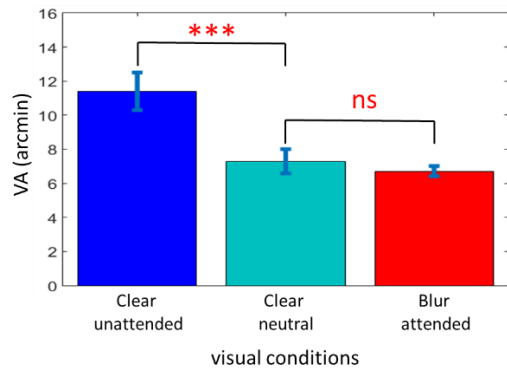

571

572 Figure 4

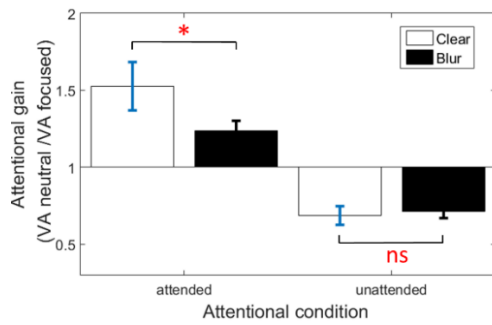

573

574 Figure 5

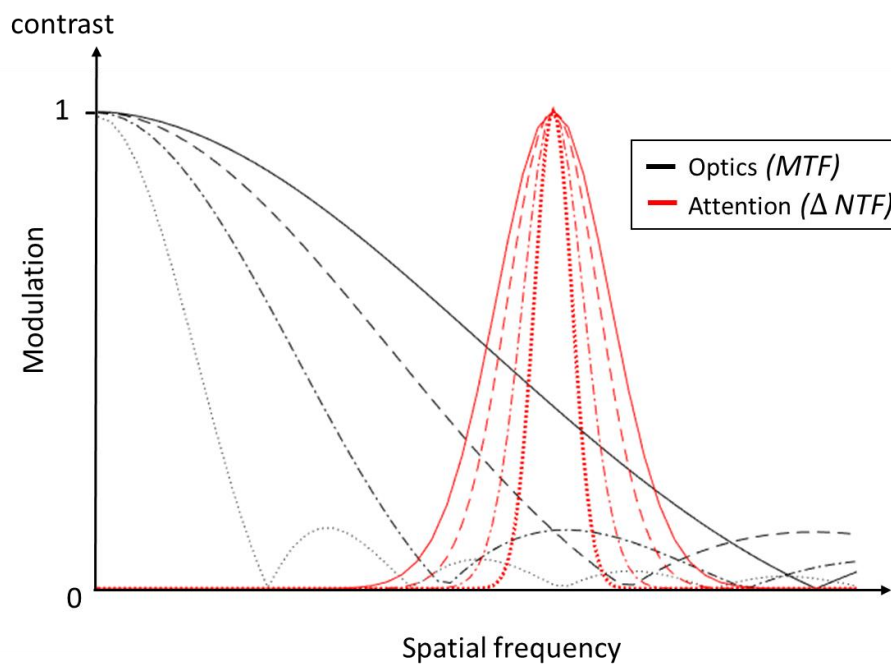

575

576 Figure 6

577 a

b



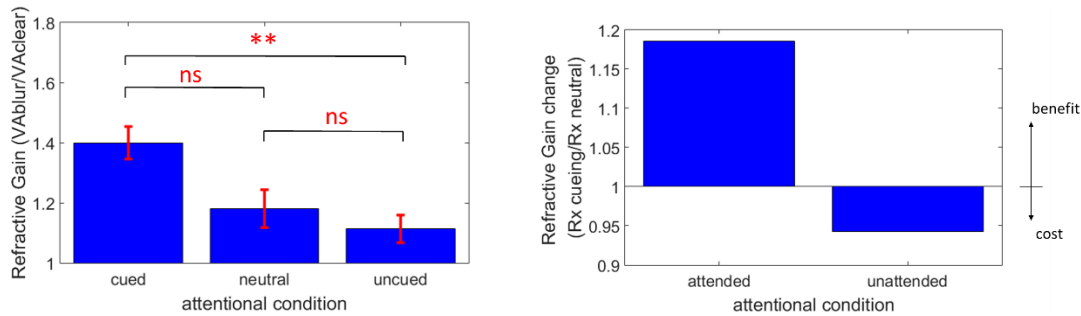

578

579 Figure 7

580

### 581 Figure Legends

582 **Figure 1.** Visual acuity in the near-peripheral retina. In this example, the subject was required  
 583 to respond to the Landolt C located in the SE quadrant. Visual acuity was tested at two locations  
 584 (NW and SE) under various blur levels (blurred and clear) and cueing conditions (cued, uncued,  
 585 and neutral). NW, north-west; SE, south-east; RT, response time.

586

587 **Figure 2.** Spatial cueing. (a) Mean visual acuity (VA) for the three cue conditions. (b) Changes  
 588 in VA at the attended and unattended locations using the neutral condition as a baseline  
 589 ( $VA_{\text{neutral}} - VA_{\text{cued}}$  and  $VA_{\text{neutral}} - VA_{\text{uncued}}$ , respectively). (c) Mean response time (RT) for the three  
 590 cue conditions. (d) Changes in RT at the attended and unattended locations using the neutral  
 591 condition as a baseline ( $RT_{\text{neutral}} - RT_{\text{cued}}$  and  $RT_{\text{neutral}} - RT_{\text{uncued}}$ , respectively). In this and  
 592 following figures, error bars represent one standard error of the mean.

593

594 **Figure 3.** Spatial cueing and visual blur. (a) visual acuity (VA) for the three cue conditions and  
 595 the two blurred conditions. (b) Changes in VA at the attended and unattended locations for the  
 596 two blurred conditions using the neutral condition as a baseline ( $VA_{\text{neutral}} - VA_{\text{cued}}$  and  $VA_{\text{neutral}} -$   
 597  $VA_{\text{uncued}}$ , respectively). (c) Response time (RT) for the three cue conditions and the two blurred  
 598 conditions. (d) Changes in RT at the attended and unattended locations for the two blurred  
 599 conditions using the neutral condition as a baseline ( $RT_{\text{neutral}} - RT_{\text{cued}}$  and  $RT_{\text{neutral}} - RT_{\text{uncued}}$ ,

600 respectively). (e) Effect of visual blur on visual acuity under the three cue conditions. Acuity  
601 difference between blurred and clear targets. When attention becomes diverted from the target  
602 location, the difference of resolution between blurred and clear images is mitigated.

603

604 **Figure 4.** Interaction between attention and blur. Mean VA for different combinations of  
605 attention and blur levels. The deployment of attention resulted in a defocused system (blur  
606 image) that performs better than, or the same as, a focused system (clear image). This indicates  
607 that different combinations of the degree of a person's attention and his/her optical correction  
608 are possible for the visual system to achieve a given acuity resolution.

609

610 **Figure 5.** Impact of visual blur on the beneficial effect of attention. Effect of attentional  
611 modulation on VA. Ratio in VA between neutral and focused conditions ( $VA_{\text{neutral}}/VA_{\text{focused}}$ ) at  
612 cued and uncued locations (i.e., cued and uncued conditions, respectively). Visual blur  
613 decreased both beneficial and cost effects of cued attentional orienting, which resulted in a  
614 narrower range of resolvable stimulus by the focus of attention.

615

616 **Figure 6.** Changes of optical and neural filter. Schematic diagram showing how the gain of a  
617 spatially localized attentional filter ( $\Delta NTF$ ) could vary in response to the variation of the  
618 modulation transfer function ( $MTF$ ) of the eye for various level of defocus. The rate of the dash  
619 line indicates the level of blur associated with the optical and attentional filter. As the magnitude  
620 of blur increases, the maximum effective width of the attentional filter is reduced in the highest  
621 spatial frequency of the image due to the shrinkage of the area under the modulation transfer  
622 function.

623

624 **Figure 7.** Impact of attention on refractive gain. (a) Ratio in VA between blur and clear images

625  $(R_x = VA_{\text{blur}}/VA_{\text{clear}})$  as a function of cueing conditions. As attention diminished, the beneficial  
626 effect of blur correction decreased. **(b)** Refractive gain change ( $R_{x\text{cueing}}/R_{x\text{neutral}}$ ) from the  
627 baseline condition (i.e., neutral attention) associated with attention modulation. Attention  
628 focusing resulted in a large increase in the expected gain of blur correction with respect to  
629 neutral condition, but only slight reduction accompanied attentional diversion.  
630
